# Supplementary material
Source: PubMed Central journal article supplement (PMC3079784)
Supplement: NIHMS262893-supplement-Supp_Data.pdf [file NIHMS262893-supplement-Supp_Data.pdf]

| ID. No. | genotype                               | sex | DOB        | IR date    | DOD        | Lifespan(wks) | tumor type(s)                       |
|---------|----------------------------------------|-----|------------|------------|------------|---------------|-------------------------------------|
| 95      | RMI1 <sup>+/-</sup> p53 <sup>+/-</sup> | F   | 8/10/2007  | 9/12/2007  | 12/31/2007 | 20.4          | unknown                             |
| 122     | RMI1 <sup>+/-</sup> p53 <sup>+/-</sup> | M   | 8/30/2007  | 10/18/2007 | 1/29/2008  | 21.7          | lymphoma                            |
| 217     | RMI1 <sup>+/-</sup> p53 <sup>+/-</sup> | F   | 2/11/2008  | 3/26/2008  | 7/22/2008  | 23.3          | lymphoma, osteosarcoma              |
| 140     | RMI1 <sup>+/-</sup> p53 <sup>+/-</sup> | F   | 9/2/2007   | 10/18/2007 | 3/1/2008   | 26.1          | lymphoma                            |
| 218     | RMI1 <sup>+/-</sup> p53 <sup>+/-</sup> | F   | 2/11/2007  | 3/26/2008  | 9/3/2008   | 29.3          | lymphoma                            |
| 178     | RMI1 <sup>+/-</sup> p53 <sup>+/-</sup> | M   | 11/24/2007 | 1/29/2008  | 6/30/2008  | 31.4          | osteosarcoma                        |
| 208     | RMI1 <sup>+/-</sup> p53 <sup>+/-</sup> | F   | 2/10/2007  | 3/26/2008  | 9/26/2008  | 32.7          | lymphoma                            |
| 79      | RMI1 <sup>+/-</sup> p53 <sup>+/-</sup> | M   | 7/9/2007   | 8/20/2007  | 2/27/2008  | 33.1          | unknown                             |
| 117     | RMI1 <sup>+/-</sup> p53 <sup>+/-</sup> | F   | 8/30/2007  | 10/8/2007  | 4/25/2008  | 34.1          | unknown                             |
| 228     | RMI1 <sup>+/-</sup> p53 <sup>+/-</sup> | M   | 2/11/2008  | 3/26/2008  | 10/10/2008 | 34.5          | carcinoma                           |
| 135     | RMI1 <sup>+/-</sup> p53 <sup>+/-</sup> | M   | 9/2/2007   | 10/8/2007  | 4/26/2008  | 34.6          | lymphoma                            |
| 77      | RMI1 <sup>+/-</sup> p53 <sup>+/-</sup> | M   | 7/9/2007   | 8/20/2007  | 3/7/2008   | 34.6          | osteosarcoma, sarcoma               |
| 214     | RMI1 <sup>+/-</sup> p53 <sup>+/-</sup> | F   | 2/10/2008  | 3/26/2008  | 11/18/2008 | 36.9          | lymphoma                            |
| 223     | RMI1 <sup>+/-</sup> p53 <sup>+/-</sup> | M   | 2/11/2008  | 3/26/2008  | 11/1/2008  | 37.3          | lymphoma                            |
| 74      | RMI1 <sup>+/-</sup> p53 <sup>+/-</sup> | F   | 6/25/2007  | 8/6/2007   | 4/12/2008  | 41.9          | lymphoma                            |
| 96      | RMI1 <sup>+/-</sup> p53 <sup>+/-</sup> | F   | 8/10/2007  | 9/12/2007  | 6/23/2008  | 45.4          | carcinoma                           |
| 173     | RMI1 <sup>+/-</sup> p53 <sup>+/-</sup> | F   | 11/24/2007 | 1/29/2008  | 10/22/2008 | 47.6          | sarcoma, lymphoma                   |
| 190     | RMI1 <sup>+/-</sup> p53 <sup>+/-</sup> | M   | 11/23/2007 | 1/29/2008  | 12/12/2008 | 54.9          | lymphoma, adenocarcinoma            |
| 80      | RMI1 <sup>+/-</sup> p53 <sup>+/-</sup> | M   | 7/9/2007   | 8/20/2007  | 8/20/2008  | 58            | lymphoma                            |
| 73      | RMI1 <sup>+/-</sup> p53 <sup>+/-</sup> | M   | 6/25/2007  | 8/6/2007   | 3/18/2009  |               | sacrificed by the end of experiment |
| 182     | RMI1 <sup>+/-</sup> p53 <sup>+/-</sup> | F   | 11/23/2007 | 1/29/2008  | 3/18/2009  |               | sacrificed by the end of experiment |
| 184     | RMI1 <sup>+/-</sup> p53 <sup>+/-</sup> | F   | 11/23/2007 | 1/29/2008  | 3/18/2009  |               | sacrificed by the end of experiment |
| 180     | RMI1 <sup>+/-</sup> p53 <sup>+/-</sup> | M   | 11/24/2007 | 1/29/2008  | 3/18/2009  |               | sacrificed by the end of experiment |
| 209     | RMI1 <sup>+/-</sup> p53 <sup>+/+</sup> | F   | 2/10/2008  | 3/26/2008  | 7/15/2008  | 22.1          | unknown                             |
| 216     | RMI1 <sup>+/-</sup> p53 <sup>+/+</sup> | F   | 2/10/2008  | 3/26/2008  | 8/21/2008  | 27.3          | lymphoma                            |
| 121     | RMI1 <sup>+/-</sup> p53 <sup>+/+</sup> | M   | 8/30/2007  | 10/18/2007 | 4/12/2008  | 32.4          | lymphoma                            |
| 137     | RMI1 <sup>+/-</sup> p53 <sup>+/+</sup> | F   | 9/2/2007   | 10/18/2007 | 10/1/2008  | 55            | sarcoma                             |
| 101     | RMI1 <sup>+/-</sup> p53 <sup>+/+</sup> | M   | 8/10/2007  | 10/18/2007 | 10/7/2008  | 60.4          | unknown                             |
| 81      | RMI1 <sup>+/-</sup> p53 <sup>+/+</sup> | F   | 7/23/2007  | 9/3/2007   | 12/21/2008 | 73.6          | lymphoma                            |
| 139     | RMI1 <sup>+/-</sup> p53 <sup>+/+</sup> | F   | 9/2/2007   | 10/18/2007 | 3/6/2009   | 78.4          | sarcoma                             |
| 71      | RMI1 <sup>+/-</sup> p53 <sup>+/+</sup> | M   | 6/25/2007  | 8/6/2007   | 3/18/2009  |               | sacrificed by the end of experiment |
| 84      | RMI1 <sup>+/-</sup> p53 <sup>+/+</sup> | F   | 7/23/2007  | 9/3/2007   | 3/18/2009  |               | sacrificed by the end of experiment |
| 86      | RMI1 <sup>+/-</sup> p53 <sup>+/+</sup> | M   | 7/23/2007  | 9/3/2007   | 3/18/2009  |               | sacrificed by the end of experiment |
| 87      | RMI1 <sup>+/-</sup> p53 <sup>+/+</sup> | M   | 7/23/2007  | 9/3/2007   | 3/18/2009  |               | sacrificed by the end of experiment |
| 93      | RMI1 <sup>+/-</sup> p53 <sup>+/+</sup> | M   | 8/4/2007   | 9/12/2007  | 3/18/2009  |               | sacrificed by the end of experiment |
| 102     | RMI1 <sup>+/-</sup> p53 <sup>+/+</sup> | F   | 8/19/2007  | 10/18/2007 | 3/18/2009  |               | sacrificed by the end of experiment |
| 106     | RMI1 <sup>+/-</sup> p53 <sup>+/+</sup> | F   | 8/19/2007  | 10/18/2007 | 3/18/2009  |               | sacrificed by the end of experiment |
| 115     | RMI1 <sup>+/-</sup> p53 <sup>+/+</sup> | M   | 8/19/2007  | 10/18/2007 | 3/18/2009  |               | sacrificed by the end of experiment |
| 116     | RMI1 <sup>+/-</sup> p53 <sup>+/+</sup> | M   | 8/19/2007  | 10/18/2007 | 3/18/2009  |               | sacrificed by the end of experiment |
| 141     | RMI1 <sup>+/-</sup> p53 <sup>+/+</sup> | F   | 9/2/2007   | 10/18/2007 | 3/18/2009  |               | sacrificed by the end of experiment |
| 193     | RMI1 <sup>+/-</sup> p53 <sup>+/+</sup> | M   | 11/23/2007 | 1/29/2008  | 3/18/2009  |               | sacrificed by the end of experiment |
| 189     | RMI1 <sup>+/-</sup> p53 <sup>+/+</sup> | M   | 11/23/2007 | 1/29/2008  | 3/18/2009  |               | sacrificed by the end of experiment |
| 177     | RMI1 <sup>+/-</sup> p53 <sup>+/+</sup> | M   | 11/24/2007 | 1/29/2008  | 3/18/2009  |               | sacrificed by the end of experiment |
| 210     | RMI1 <sup>+/-</sup> p53 <sup>+/+</sup> | F   | 2/10/2008  | 3/26/2008  | 3/18/2009  |               | sacrificed by the end of experiment |
| 226     | RMI1 <sup>+/-</sup> p53 <sup>+/+</sup> | M   | 2/11/2008  | 3/26/2008  | 3/18/2009  |               | sacrificed by the end of experiment |
| 227     | RMI1 <sup>+/-</sup> p53 <sup>+/+</sup> | M   | 2/11/2008  | 3/26/2008  | 3/18/2009  |               | sacrificed by the end of experiment |

| ID. No. | genotype                               | sex | DOB        | IR date    | DOD        | Lifespan(wks) | tumor type(s)                       |
|---------|----------------------------------------|-----|------------|------------|------------|---------------|-------------------------------------|
| 99      | RMI1 <sup>+/+</sup> p53 <sup>+/-</sup> | F   | 8/10/2007  | 9/12/2007  | 2/8/2008   | 26.1          | lymphoma                            |
| 107     | RMI1 <sup>+/+</sup> p53 <sup>+/-</sup> | M   | 8/19/2007  | 9/12/2007  | 3/28/2008  | 31.4          | lymphoma                            |
| 227     | RMI1 <sup>+/+</sup> p53 <sup>+/-</sup> | M   | 2/11/2008  | 3/26/2008  | 10/25/2008 | 36.6          | unknown                             |
| 225     | RMI1 <sup>+/+</sup> p53 <sup>+/-</sup> | M   | 2/11/2008  | 3/26/2008  | 11/13/2008 | 39.1          | lymphoma                            |
| 118     | RMI1 <sup>+/+</sup> p53 <sup>+/-</sup> | F   | 8/30/2007  | 10/18/2007 | 6/3/2008   | 39.6          | lymphoma, adenocarcinoma            |
| 211     | RMI1 <sup>+/+</sup> p53 <sup>+/-</sup> | F   | 2/10/2008  | 3/26/2008  | 12/16/2008 | 44.1          | unknown                             |
| 97      | RMI1 <sup>+/+</sup> p53 <sup>+/-</sup> | F   | 8/10/2007  | 9/12/2007  | 6/23/2008  | 45.3          | lymphoma, adenocarcinoma            |
| 105     | RMI1 <sup>+/+</sup> p53 <sup>+/-</sup> | F   | 8/19/2007  | 9/12/2007  | 7/18/2008  | 47.6          | unknown                             |
| 76      | RMI1 <sup>+/+</sup> p53 <sup>+/-</sup> | F   | 7/9/2007   | 8/20/2007  | 6/25/2008  | 50            | unknown                             |
| 94      | RMI1 <sup>+/+</sup> p53 <sup>+/-</sup> | F   | 8/4/2007   | 9/12/2007  | 8/6/2008   | 52.4          | lymphoma, adenocarcinoma            |
| 164     | RMI1 <sup>+/+</sup> p53 <sup>+/-</sup> | M   | 10/1/2007  | 10/18/2007 | 10/10/2008 | 53.4          | osteosarcoma                        |
| 176     | RMI1 <sup>+/+</sup> p53 <sup>+/-</sup> | F   | 11/24/2007 | 1/29/2008  | 12/31/2008 | 57.4          | sarcoma                             |
| 174     | RMI1 <sup>+/+</sup> p53 <sup>+/-</sup> | F   | 11/24/2007 | 1/29/2008  | 1/6/2009   | 58.3          | osteosarcoma                        |
| 179     | RMI1 <sup>+/+</sup> p53 <sup>+/-</sup> | M   | 11/24/2007 | 1/29/2008  | 3/6/2009   | 66.7          | unknown                             |
| 100     | RMI1 <sup>+/+</sup> p53 <sup>+/-</sup> | M   | 8/10/2007  | 9/12/2007  | 12/26/2008 | 71.6          | lymphoma                            |
| 85      | RMI1 <sup>+/+</sup> p53 <sup>+/-</sup> | M   | 7/23/2007  | 9/3/2007   | 3/18/2009  |               | sacrificed by the end of experiment |
| 92      | RMI1 <sup>+/+</sup> p53 <sup>+/-</sup> | M   | 8/5/2007   | 9/12/2007  | 3/18/2009  |               | sacrificed by the end of experiment |
| 185     | RMI1 <sup>+/+</sup> p53 <sup>+/-</sup> | F   | 11/23/2007 | 1/29/2008  | 3/18/2009  |               | sacrificed by the end of experiment |
| 215     | RMI1 <sup>+/+</sup> p53 <sup>+/-</sup> | F   | 2/9/2008   | 3/26/2008  | 3/18/2009  |               | sacrificed by the end of experiment |
| 220     | RMI1 <sup>+/+</sup> p53 <sup>+/-</sup> | M   | 2/10/2008  | 3/26/2008  | 3/18/2009  |               | sacrificed by the end of experiment |
| 75      | RMI1 <sup>+/+</sup> p53 <sup>+/+</sup> | M   | 6/25/2007  | 8/6/2007   | 1/29/2008  | 26.7          | lymphoma                            |
| 136     | RMI1 <sup>+/+</sup> p53 <sup>+/+</sup> | F   | 9/2/2007   | 10/18/2007 | 5/27/2008  | 38.3          | lymphoma                            |
| 219     | RMI1 <sup>+/+</sup> p53 <sup>+/+</sup> | F   | 2/10/2008  | 3/26/2008  | 1/15/2009  | 48.6          | lymphoma                            |
| 188     | RMI1 <sup>+/+</sup> p53 <sup>+/+</sup> | M   | 11/23/2007 | 1/29/2008  | 12/12/2008 | 54.9          | lymphoma sarcoma                    |
| 72      | RMI1 <sup>+/+</sup> p53 <sup>+/+</sup> | M   | 6/25/2007  | 8/6/2007   | 7/27/2008  | 56.7          | unknown                             |
| 119     | RMI1 <sup>+/+</sup> p53 <sup>+/+</sup> | F   | 8/30/2007  | 10/18/2007 | 10/7/2008  | 57.6          | lymphoma                            |
| 138     | RMI1 <sup>+/+</sup> p53 <sup>+/+</sup> | F   | 9/2/2007   | 10/18/2007 | 12/8/2008  | 66            | lymphoma                            |
| 114     | RMI1 <sup>+/+</sup> p53 <sup>+/+</sup> | M   | 8/19/2007  | 10/18/2007 | 12/12/2008 | 68.6          | lymphoma                            |
| 124     | RMI1 <sup>+/+</sup> p53 <sup>+/+</sup> | M   | 8/30/2007  | 10/18/2007 | 1/29/2009  | 73.9          | lymphoma, agiosarcoma               |
| 78      | RMI1 <sup>+/+</sup> p53 <sup>+/+</sup> | M   | 7/9/2007   | 8/20/2007  | 3/18/2009  |               | sacrificed by the end of experiment |
| 83      | RMI1 <sup>+/+</sup> p53 <sup>+/+</sup> | F   | 7/23/2007  | 9/3/2007   | 3/18/2009  |               | sacrificed by the end of experiment |
| 82      | RMI1 <sup>+/+</sup> p53 <sup>+/+</sup> | F   | 7/23/2007  | 9/3/2007   | 3/18/2009  |               | sacrificed by the end of experiment |
| 104     | RMI1 <sup>+/+</sup> p53 <sup>+/+</sup> | F   | 8/19/2007  | 10/18/2007 | 3/18/2009  |               | sacrificed by the end of experiment |
| 120     | RMI1 <sup>+/+</sup> p53 <sup>+/+</sup> | F   | 8/30/2007  | 10/18/2007 | 3/18/2009  |               | sacrificed by the end of experiment |
| 125     | RMI1 <sup>+/+</sup> p53 <sup>+/+</sup> | M   | 8/30/2007  | 10/18/2007 | 3/18/2009  |               | sacrificed by the end of experiment |
| 123     | RMI1 <sup>+/+</sup> p53 <sup>+/+</sup> | M   | 8/30/2007  | 10/18/2007 | 3/18/2009  |               | sacrificed by the end of experiment |
| 134     | RMI1 <sup>+/+</sup> p53 <sup>+/+</sup> | M   | 9/2/2007   | 10/18/2007 | 3/18/2009  |               | sacrificed by the end of experiment |
| 142     | RMI1 <sup>+/+</sup> p53 <sup>+/+</sup> | F   | 9/2/2007   | 10/18/2007 | 3/18/2009  |               | sacrificed by the end of experiment |
| 191     | RMI1 <sup>+/+</sup> p53 <sup>+/+</sup> | M   | 11/23/2007 | 1/29/2008  | 3/18/2009  |               | sacrificed by the end of experiment |
| 186     | RMI1 <sup>+/+</sup> p53 <sup>+/+</sup> | F   | 11/23/2007 | 1/29/2008  | 3/18/2009  |               | sacrificed by the end of experiment |
| 183     | RMI1 <sup>+/+</sup> p53 <sup>+/+</sup> | F   | 11/23/2007 | 1/29/2008  | 3/18/2009  |               | sacrificed by the end of experiment |
| 187     | RMI1 <sup>+/+</sup> p53 <sup>+/+</sup> | M   | 11/23/2007 | 1/29/2008  | 3/18/2009  |               | sacrificed by the end of experiment |
| 188     | RMI1 <sup>+/+</sup> p53 <sup>+/+</sup> | M   | 11/23/2007 | 1/29/2008  | 3/18/2009  |               | sacrificed by the end of experiment |
| 175     | RMI1 <sup>+/+</sup> p53 <sup>+/+</sup> | F   | 11/24/2007 | 1/29/2008  | 3/18/2009  |               | sacrificed by the end of experiment |
| 181     | RMI1 <sup>+/+</sup> p53 <sup>+/+</sup> | M   | 11/24/2007 | 1/29/2008  | 3/18/2009  |               | sacrificed by the end of experiment |
| 213     | RMI1 <sup>+/+</sup> p53 <sup>+/+</sup> | F   | 2/9/2008   | 3/26/2008  | 3/18/2009  |               | sacrificed by the end of experiment |
| 222     | RMI1 <sup>+/+</sup> p53 <sup>+/+</sup> | M   | 2/10/2008  | 3/26/2008  | 3/18/2009  |               | sacrificed by the end of experiment |
| 221     | RMI1 <sup>+/+</sup> p53 <sup>+/+</sup> | M   | 2/10/2008  | 3/26/2008  | 3/18/2009  |               | sacrificed by the end of experiment |
